# Supplementary material
Source: PubMed Central journal article supplement (PMC8190972)
Supplement: NIHMS1706612-supplement-1.pdf [file NIHMS1706612-supplement-1.pdf]

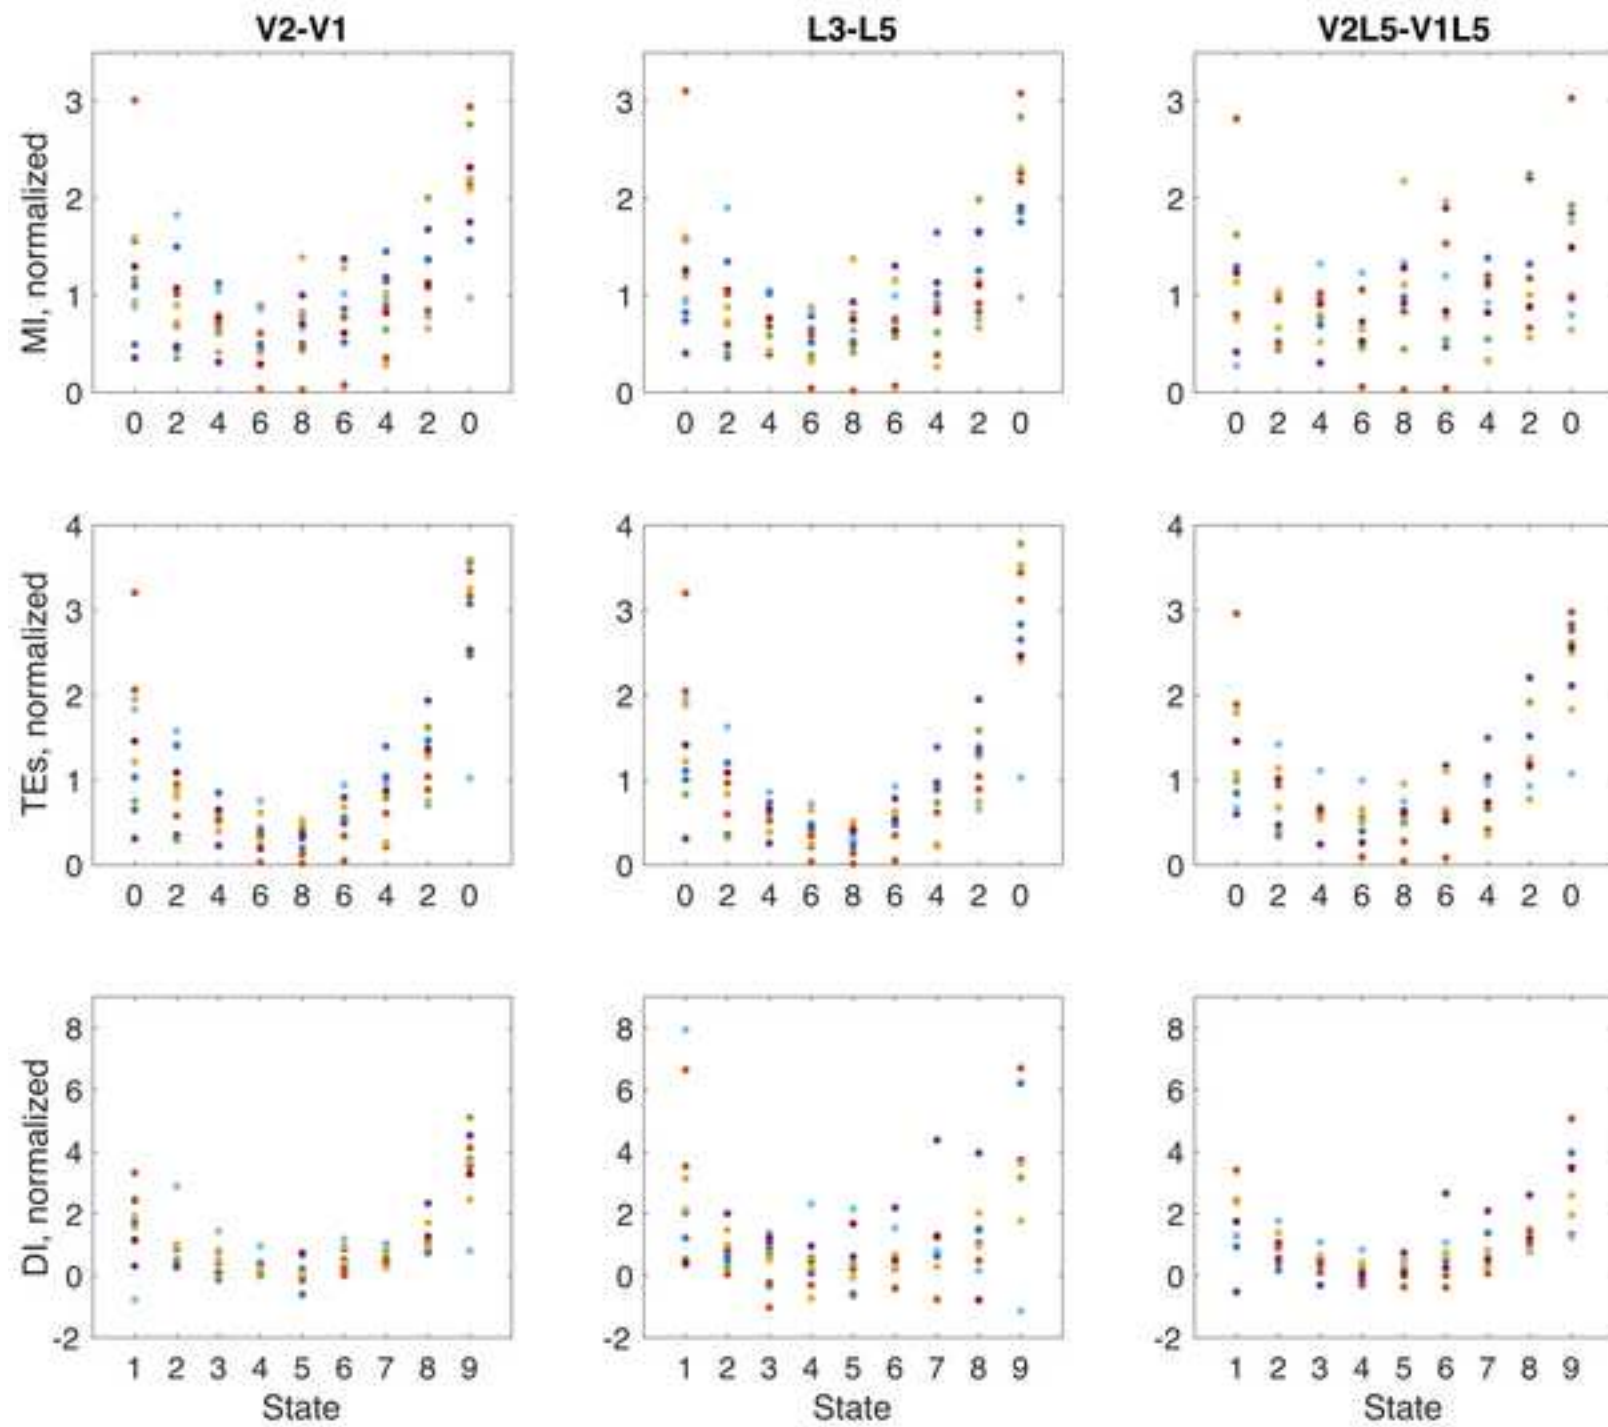

**Figure S1.** Individual data from all animals for the three most relevant neuronal interactions; i.e., between secondary and primary visual cortex (V2-V1), (layer 3 and layer 5 (L3-L5), and (secondary visual cortex layer 5 and primary visual cortex layer 5 (V2L5-V1L5). MI: mutual information, TE<sub>s</sub>: transfer entropy sum, DI: directionality index. Region labels are ordered so that the average directionality index is positive at baseline 0% desflurane. States 1 to 9 correspond to consecutive desflurane concentrations of 0, 2, 4, 6, 8, 6, 4, 2, 0 percent, respectively.
